# Supplementary material
Source: publisher figshare collection journal article supplement (https://karger.figshare.com/ndownloader/files/13637864)
Supplement: Supplementary file 1 [file 13637864]

## **Supplementary Material**

# **Arginine-Depleting Enzymes – An Increasingly Recognized Treatment Strategy For Therapy- Refractory Malignancies**

Christin Riess<sup>a</sup> Fatemeh Shokraie<sup>b</sup> Carl Friedrich Classen<sup>b</sup>  
Bernd Kreikemeyer<sup>a</sup> Tomas Fiedler<sup>a</sup> Christian Junghans<sup>c</sup>  
Claudia Maletzki<sup>c</sup>

<sup>a</sup>Institute for Medical Microbiology, Virology, and Hygiene, Rostock, <sup>b</sup>University Children's Hospital, Rostock University Medical Centre, Rostock, <sup>c</sup>Department of Medicine, Clinic III-Hematology/Oncology/Palliative Care, Rostock University Medical Center, University of Rostock, Rostock, Germany

**Table S1: Preclinical approaches to target Arginine-auxotrophic cancer.**

| Study setting/<br>Reference   | Tumor entity/entities                                                                                              | Additional intervention                                              | Treatment schedule                                                                                                                                                                                                     | Methods                                                                                                                                                                                                                                                                                                                                                                                              | Outcome                                                                                                                                                                                                                                                                                                                                                                                                                                                                                                                                                                                                                                                                                                         |
|-------------------------------|--------------------------------------------------------------------------------------------------------------------|----------------------------------------------------------------------|------------------------------------------------------------------------------------------------------------------------------------------------------------------------------------------------------------------------|------------------------------------------------------------------------------------------------------------------------------------------------------------------------------------------------------------------------------------------------------------------------------------------------------------------------------------------------------------------------------------------------------|-----------------------------------------------------------------------------------------------------------------------------------------------------------------------------------------------------------------------------------------------------------------------------------------------------------------------------------------------------------------------------------------------------------------------------------------------------------------------------------------------------------------------------------------------------------------------------------------------------------------------------------------------------------------------------------------------------------------|
| <i>in vitro</i> [81]          | HCC (Sk-Hep1, Huh7, Tong, HCC36, Hep3B, Malhavu, PLC5, Huh6, HepG2, SNU398, SNU182 Ovarian cancer (A2780, A2780CR) | Cisplatin                                                            | ADI-PEG20 (IC <sub>50</sub> )<br>Cisplatin (IC <sub>50</sub> )                                                                                                                                                         | <ul style="list-style-type: none"> <li>- cell viability assay (CellTiter-Glo)</li> <li>- protein abundance (WB: ASS1)</li> <li>- MSP</li> </ul>                                                                                                                                                                                                                                                      | <ul style="list-style-type: none"> <li>- ASS1: ADI-PEG20 sensitivity, cisplatin resistance</li> <li>- methylation status of ASS1 promoter correlates with ADI-PEG20 sensitivity and cisplatin resistance</li> <li>- Cisplatin: down-regulates ASS1 in ASS1<sup>+</sup> HCC</li> <li>- ASS1 expression level during combination treatment predominantly dictated by ADI-PEG 20</li> </ul>                                                                                                                                                                                                                                                                                                                        |
| <i>in vitro</i> [78]          | ASS1 <sup>+</sup> HCC (SNU398, SNU38), ASS1 <sup>+</sup> HCC (HepG2, Huh-1) BJ-1 fibroblast                        | 5-FU                                                                 | ADI-PEG20 (0.1 µg/mL) and/or 0.1/0.2 µg/mL 5-FU                                                                                                                                                                        | <ul style="list-style-type: none"> <li>- proliferation assay (MTT)</li> <li>- gene expression (RT-PCR: <i>ASS1</i>, <i>OTC</i>)</li> <li>- protein abundance (WB: ASS1, XIAP, caspase-3, Mcl-1, Bcl2, TS, DPYD, PH-CAD)</li> <li>- apoptosis/necrosis assay (flow cytometry (FC): Annexin V/PI)</li> <li>- immunohistochemistry (IHC): ASS1 (40 HCC patients)</li> </ul>                             | <ul style="list-style-type: none"> <li>- irreversible inhibition of thymidylate synthase</li> <li>- lethal DNA damage</li> <li>- mechanism: decline of survivin, Mcl-1, XIAP, Bcl-2</li> <li>- increased apoptosis (Annexin V<sup>+</sup>/PI<sup>+</sup>; cleaved caspase-3)</li> <li>- BUT: Re-expression of ASS1</li> </ul>                                                                                                                                                                                                                                                                                                                                                                                   |
| <i>in vitro, in vivo</i> [92] | Melanoma (A2058, SK-MEL-2, A375), Breast cancer (MDA-MB-231)                                                       | PI3K inhibitors (LY294002, PI103), AKT inhibitors (VIII, perifosine) | ADI-PEG20 (0.3 µg/mL); LY294002 (5 µM), PI103 (1 µM), AKT inhibitor VIII (5 µM), Perifosine (5 µM)<br>Xenografting (2 × 10 <sup>6</sup> A2058 cells s.c.): ADI-PEG20 (4 IU/mouse), LY294002 (25 mg/kg bw), combination | <ul style="list-style-type: none"> <li>- siRNA transfection: transfected GSK-3 (α and β)</li> <li>- immunoprecipitation, Protein abundance (WB), and gene expression: c-Myc, Actin, p-S62-Myc, ERK, p-ERK, pGSK-3α, GSK-3α, pG Ras, total Ras, pT308-AKT, AKT, ERK, p-ERK, ASSK-3β, GSK-3β, p-T58-Myc</li> <li>- enzymatic activity assays: PI3K, PTEN</li> <li>- DNA fragmentation assay</li> </ul> | <ul style="list-style-type: none"> <li>- ADI-PEG20 induces c-Myc protein stabilization: <ul style="list-style-type: none"> <li>a.) inhibition of ubiquitin-mediated protein degradation</li> <li>b.) mediated by ERK and PI3K/AKT-GSK3β signaling pathways</li> <li>c.) involvement of Ras signaling in c-Myc stabilization</li> </ul> </li> <li>- <i>in vivo</i>: PI3K/AKT inhibition enhances ADI-PEG20-mediated cell killing via apoptosis + antitumor activity</li> </ul>                                                                                                                                                                                                                                   |
| <i>in vitro</i> [68]          | Melanoma (A2058, SK-Mel-2, A375)                                                                                   | LY294002, mesylate, CoCl <sub>2</sub> , Perifosine                   | ADI-PEG20 (5–10 IU/mg), LY294002 (IC <sub>50</sub> ), mesylate (50 µM), CoCl <sub>2</sub> (100 µM), Perifosine (IC <sub>50</sub> )                                                                                     | <ul style="list-style-type: none"> <li>- establishment of ADI resistant cells</li> <li>- glucose uptake (radioactivity)</li> <li>- establishment of stable ASS1-overexpressing cell lines</li> <li>- protein abundance (WB: ASS1, c-Myc, HIF1α)</li> <li>- chromatin immunoprecipitation</li> <li>- proliferation assay (MTT)</li> </ul>                                                             | <ul style="list-style-type: none"> <li>- elevated ASS1 expression in ADI resistant cells: c-Myc and HIF-1α interaction and mTOR downregulation</li> <li>- ADI resistant cells: <ul style="list-style-type: none"> <li>a.) sensitive to PI3K/AKT inhibitors</li> <li>b.) enhanced ASL expression and glycolytic activities (<i>Warburg effect</i>)</li> <li>c.) sensitive to glycolytic inhibitors</li> <li>d.) elevated glutaminolytic metabolism and increased sensitivity to glutaminase inhibitors</li> <li>e.) c-Myc, but not elevated ASS1, contributes to the enhanced glycolytic and glutaminolytic metabolisms</li> <li>f.) expression of enzymes involved in lipid biosynthesis</li> </ul> </li> </ul> |

|                               |                                                                                                                      |                                                                                      |                                                                                                                                                                                                                                                                                                                                |                                                                                                                                                                                                                                                                                                                                                                                                                                                                                                                                                                                             |                                                                                                                                                                                                                                                                                                                                                                                                                                                                                                                                                                                                                                                                                               |
|-------------------------------|----------------------------------------------------------------------------------------------------------------------|--------------------------------------------------------------------------------------|--------------------------------------------------------------------------------------------------------------------------------------------------------------------------------------------------------------------------------------------------------------------------------------------------------------------------------|---------------------------------------------------------------------------------------------------------------------------------------------------------------------------------------------------------------------------------------------------------------------------------------------------------------------------------------------------------------------------------------------------------------------------------------------------------------------------------------------------------------------------------------------------------------------------------------------|-----------------------------------------------------------------------------------------------------------------------------------------------------------------------------------------------------------------------------------------------------------------------------------------------------------------------------------------------------------------------------------------------------------------------------------------------------------------------------------------------------------------------------------------------------------------------------------------------------------------------------------------------------------------------------------------------|
| <i>in vitro</i> [69]          | ASS1 <sup>+</sup> Melanoma (A375, A2058)                                                                             | TRAIL inhibitor, Z-VAD-FMK), calpain inhibitor (ALLN)                                | ADI-PEG20 (0.1 g/ml)                                                                                                                                                                                                                                                                                                           | <ul style="list-style-type: none"> <li>- proliferation assay (MTT)</li> <li>- apoptosis/autophagy assay (Annexin V/FITC; GFP-LC3)</li> <li>- protein abundance (WB: Atg5, Beclin-1, LC3B)</li> </ul>                                                                                                                                                                                                                                                                                                                                                                                        | <ul style="list-style-type: none"> <li>- combined TRAIL and arginine deprivation: accelerated cell death: <ul style="list-style-type: none"> <li>a.) TRAIL attenuated autophagic process during arginine deprivation</li> <li>b.) Beclin-1 and Atg5 cleavage</li> </ul> </li> </ul>                                                                                                                                                                                                                                                                                                                                                                                                           |
| <i>in vitro</i> [93]          | Melanoma (A2058, SK-Mel-2), embryonic kidney (HEK 293)                                                               | SAHA, HAT inhibitors (PU139, I-CBP112) CoCl <sub>2</sub> , MG-132                    | ADI-PEG20 (5–10 IU/mg), CoCl <sub>2</sub> (150 μM), MG-132 (10 μM)                                                                                                                                                                                                                                                             | <ul style="list-style-type: none"> <li>- siRNA and transfection (Lipofection: PHD2-A/B, LIMD1, p300, HDAC1/2, Sin3A)</li> <li>- immunoprecipitation, Protein abundance (WB), chromatin immunoprecipitation: ASS1, HIF-1α, pVHL, HA, c-Myc, PHD2, HDAC2, PCBP1, LIMID1, Sin3A, p300, hydroxy-HIF-1α, eIF2α, phospho-eIF2α, mTOR, phospho-mTOR, p70S6K, 4EBP1, phospho-4EBP1</li> <li>- GST pull-down assay (GST–HIF-1α ODDD fusion)</li> <li>- <i>in vitro</i> hydroxylation assay (GST-ODDD)</li> <li>- proliferation assay (MTT)</li> <li>- apoptosis (DNA fragmentation assay)</li> </ul> | <ul style="list-style-type: none"> <li>- ADI-PEG20 induces: <ul style="list-style-type: none"> <li>a.) HIF-1α degradation at ASS1 promoter</li> <li>b.) interaction between PHD2 and HDAC2 at ASS1 promoter</li> <li>c.) H3K14ac and H3K27ac deacetylation at ASS1 promoter</li> <li>d.) ROS to promote PHD2-HDAC2 interactions</li> </ul> </li> <li>- reduced H3K14ac and H3K27ac levels in the matched patient-derived melanoma failed ADI-PEG20 treatment</li> <li>- combination: enhanced cell killing capacity</li> </ul>                                                                                                                                                                |
| <i>in vitro</i> [94]          | Mesothelioma (H211, H290, H2052, H2373, GARD, REN); immortalized fibroblasts BJ-1                                    | TRAIL                                                                                | ADI-PEG20 (0-1200 ng/ml) TRAIL (10 ng/ml)                                                                                                                                                                                                                                                                                      | <ul style="list-style-type: none"> <li>- growth inhibitory/Apoptosis (Caspase activity)</li> <li>- gene expression (RT-PCR: <i>ASS1</i>)</li> <li>- siRNA</li> <li>- protein abundance (WB: Cleaved caspase 3, caspase 9, BID)</li> </ul>                                                                                                                                                                                                                                                                                                                                                   | <ul style="list-style-type: none"> <li>- no ASS1 re-expression upon ADI-PEG20</li> <li>- mechanism: <ul style="list-style-type: none"> <li>a.) apoptosis in ASS1<sup>-</sup> and ASS1<sup>+</sup> cells</li> <li>b.) TRAIL enhanced ADI-PEG20-mediated apoptosis in ASS1<sup>-</sup> cells</li> <li>c.) combined TRAIL and ADI-PEG20 treatment: further increased apoptosis</li> </ul> </li> </ul>                                                                                                                                                                                                                                                                                            |
| <i>in vitro</i> [27]          | Primary GBM cultures + cell lines (DBTRG, GAMG, SNB19, U87, U118, CCF, LN229, 8MG, T87G, MO59J, MO59K, 42MG)         | 5'AZA Z-VAD-fmk Chloroquine                                                          | ADI-PEG20 (0–2 μg/ml) 5'AZA (5 μM) Z-VAD-fmk (50 μM) Chloroquine (10 μM)                                                                                                                                                                                                                                                       | <ul style="list-style-type: none"> <li>- IHC (ASS1, ASL, Iba-1)</li> <li>- gene expression (qPCR: <i>ASS1</i>)</li> <li>- protein abundance (WB: <i>ASS1</i>, autophagy antibody sampler kit)</li> <li>- DNA Methylation analysis (MSP and quantitative pyrosequencing: 5'AZA; <i>ASS1</i> + ASL CpG islands)</li> <li>- caspase/autophagy inhibition assay</li> <li>- <i>ASS1</i> knockdown</li> <li>- generation of stable GFP-LC3 cells</li> <li>- phenotyping (FC: CD133)</li> </ul>                                                                                                    | <ul style="list-style-type: none"> <li>- <i>ASS1</i> promoter methylation: <ul style="list-style-type: none"> <li>a.) <i>ASS1</i>/<i>ASL</i> silencing (10/22 cell lines, each)</li> <li>b.) autophagy upon arginine deprivation</li> <li>c.) predictive biomarker in GBM</li> </ul> </li> <li>- knock down confirms role of <i>ASS1</i> in ADI-PEG20 sensitivity</li> <li>- arginine auxotrophic GBM CSCs: ADI-PEG20 sensitive</li> <li>- chloroquine inhibits autophagy, accelerates effects</li> <li>- caspase inhibitors do not prevent ADI-PEG20-induced cell death</li> <li>- <i>ASS1</i> and <i>ASL</i>: frequent targets for epigenetic inactivation in clinical GBM cases</li> </ul> |
| <i>in vitro, in vivo</i> [82] | Patient-derived GBM (HROG02, HROG04, HROG05, HROG06, HROG07, HROG10, HROG13, HROG15, HROG17, HROG24, HROG36, HROG38) | temozolomide (TMZ), chloroquine, suberoylanilide hydroxamic acid (SAHA), Palomid 529 | Recombinant <i>S. pyogenes</i> ADI (35 mU/ml) TMZ (0.125 mM, 0.375 mM) chloroquine (5 mM and 20 mM), SAHA (0.25 mM and 0.5 mM), MK0683), Palomid 529 (7.5 mM) Xenografting (HROG05 tumor pieces in NMRI Foxn1 <sup>nu</sup> mice): ADI (250 U/kg bw, twice a week), Palomid 529 (1 mg/kg bw, twice a week), SAHA (25 mg/kg bw) | <ul style="list-style-type: none"> <li>- production of <i>S. pyogenes</i> ADI and activity determination</li> <li>- gene expression (qPCR: <i>ASS1</i>, <i>ASL</i>)</li> <li>- MSP (<i>ASS1</i>, <i>ASL</i>)</li> <li>- cell cycle analysis (Flow cytometric DNA analysis)</li> <li>- biomass quantification (crystal violet (CV))</li> <li>- CMFDA proliferation assay (FC-CMFDA staining)</li> </ul>                                                                                                                                                                                      | <ul style="list-style-type: none"> <li>- cell line specific response to ADI</li> <li>- inhibited proliferation of residual GBM cells</li> <li>- <i>ASS1</i> and <i>ASL</i> expression and methylation profile of primary GBM cell lines</li> <li>- combination: boosted antitumoral effects</li> <li>- antitumoral effects: independent from apoptosis</li> <li>- <i>in vivo</i>: xenograft growth inhibition</li> </ul>                                                                                                                                                                                                                                                                      |

|                               |                                                                                                                                                                  |                                                                       |                                                                                                                                                                                                                                                                                        |                                                                                                                                                                                                                                                                                                                                                                                                                                                                                 |                                                                                                                                                                                                                                                                                                                                                                                                                                                                                                                                                                                                                                                                                                                                  |
|-------------------------------|------------------------------------------------------------------------------------------------------------------------------------------------------------------|-----------------------------------------------------------------------|----------------------------------------------------------------------------------------------------------------------------------------------------------------------------------------------------------------------------------------------------------------------------------------|---------------------------------------------------------------------------------------------------------------------------------------------------------------------------------------------------------------------------------------------------------------------------------------------------------------------------------------------------------------------------------------------------------------------------------------------------------------------------------|----------------------------------------------------------------------------------------------------------------------------------------------------------------------------------------------------------------------------------------------------------------------------------------------------------------------------------------------------------------------------------------------------------------------------------------------------------------------------------------------------------------------------------------------------------------------------------------------------------------------------------------------------------------------------------------------------------------------------------|
|                               |                                                                                                                                                                  |                                                                       | twice a week), combination 1 (ADI + Palomid 529), combination 2 (ADI + SAHA)                                                                                                                                                                                                           |                                                                                                                                                                                                                                                                                                                                                                                                                                                                                 |                                                                                                                                                                                                                                                                                                                                                                                                                                                                                                                                                                                                                                                                                                                                  |
| <i>in vitro</i> [31]          | Patient-derived GBM HROG02, HROG05, HROG63, HROG52                                                                                                               | TMZ, sorafenib, Vincristine, Curcumin, Resveratrol                    | recombinant <i>S. pyogenes</i> ADI (35 mU/ml) TMZ (2.5 $\mu$ M), sorafenib (2.5 $\mu$ M), vincristine (1 nM), curcumin (1 $\mu$ M), resveratrol (10 $\mu$ M) simultaneous, sequential therapy irradiation (30 Gy)                                                                      | <ul style="list-style-type: none"> <li>- biomass quantification (CV)</li> <li>- gene expression (qPCR: Arg1, CPS1, OTC, Human Cellular Stress Responses PCR Array)</li> <li>- phenotyping (FC: CD29, Nestin, Foxp3)</li> <li>- senescence <math>\beta</math>-Galactosidase staining</li> <li>- autophagy assay (acridine-orange microscopy)</li> <li>- protein abundance (WB: LC3A/B, Atg3, Atg5, Atg12, Beclin-1)</li> <li>- radiotherapy (LD<sub>50</sub> = 30 Gy)</li> </ul> | <ul style="list-style-type: none"> <li>- ADI treatment: <ul style="list-style-type: none"> <li>a.) stress-induction, altered gene expression of genes involved in arginine biosynthesis</li> <li>b.) no significant changes in surface markers</li> <li>c.) autophagy and senescence induction</li> <li>d.) radiosensitizing effects</li> <li>e.) no resistance development after long-term treatment</li> <li>f.) simultaneous vs. sequential ADI-based therapy</li> </ul> </li> <li>- Combination: Boosted cell stress and autophagy (ADI + Resveratrol)</li> </ul>                                                                                                                                                            |
| <i>in vitro</i> [11]          | normal lymphoblastoid B-cell (NcNc), diffuse large B-cell lymphoma (DLBCL, Karpas-422), cutaneous T cell lymphoma (MyLa, SeAx)                                   | 5-Aza-dC, Chloroquine, doxorubicin                                    | ADI-PEG20 (6.7 IU/ml) 5-Aza-dC (0.5–5 $\mu$ M), Chloroquine (25 $\mu$ M), doxorubicin (1 $\mu$ M)                                                                                                                                                                                      | <ul style="list-style-type: none"> <li>- IHC (ASS)</li> <li>- MSP</li> <li>- vi-Cell cell viability analyser</li> <li>- cell cycle analysis (Flow cytometry)</li> <li>- gene expression (qPCR: ASS1)</li> <li>- protein abundance (WB: ASS, (un-)cleaved PARP, pro-caspase 3, cleaved caspase 3, LC3I/II)</li> </ul>                                                                                                                                                            | <ul style="list-style-type: none"> <li>- ASS1 protein absent in most normal and malignant lymphoid tissues (methylation in malignant but not normal cells and tissues)</li> <li>- ADI-PEG20: <ul style="list-style-type: none"> <li>a.) Reduced viability of ASS1-methylated lymphoid cells</li> <li>b.) Sensitivity dependent on ASS1 promoter methylation</li> <li>c.) Caspase-dependent apoptosis in ASS1-methylated lymphoid cell lines</li> <li>d.) Enhanced apoptosis by Chloroquine</li> </ul> </li> <li>- Clinical response to ADI-PEG20 in refractory lymphoma</li> </ul>                                                                                                                                               |
| <i>in vitro</i> [95]          | (non)-/small-cell lung cancer (SCLC vs SR2), NCI-H460 vs H465CR, ovarian cancer (A2780 vs. A2780CP70; A2008 vs. A2008CR), GBM (A172 vs A172CR), melanoma (A2058) | Cisplatin, 5-Aza-dC, CoCl <sub>2</sub> , SAHA, bortezomib carfilzomib | ADI-PEG20 (0-4 $\mu$ g/ml), SAHA (2.5 – 10 $\mu$ M)                                                                                                                                                                                                                                    | <ul style="list-style-type: none"> <li>- Gene expression (qRT-PCR: c-Myc, ASS1, HIF-1<math>\alpha</math>, DEC1)</li> <li>- Chromatin immunoprecipitation assay (ASS1 promotor-specific primers)</li> <li>- MSP and pyrosequencing</li> <li>- protein abundance (WB: ASS1, c-Myc, HIF-1<math>\alpha</math>)</li> <li>- apoptosis (DNA fragmentation assay)</li> <li>- cell growth (sulforhodamine B (SRB) assay)</li> </ul>                                                      | <ul style="list-style-type: none"> <li>- ASS1 suppression due to upregulation of HIF-1<math>\alpha</math> and downregulation of c-Myc</li> <li>- DEC1 transcriptional regulator = master regulator of HIF-1<math>\alpha</math> and c-Myc</li> <li>- Histone deacetylases modulate DEC1 and HIF-1<math>\alpha</math>/c-Myc/ASS1</li> <li>- correlation of <i>DEC1</i>, <i>HIF-1<math>\alpha</math></i>, <i>c-Myc</i> expression in tumor</li> <li>- Aza-dC induced-ASS1 expression regulated by DEC1/HIF-1<math>\alpha</math>/c-Myc axis</li> <li>- transcriptional start site and E-box sequences of ASS1 unmethylated</li> <li>- enhanced ADI-PEG20 cell-killing: proteasome inhibitors for HIF-1<math>\alpha</math></li> </ul> |
| <i>In vitro, in vivo</i> [80] | ASS1: melanoma (A375, Sk-Mel2, A2058 and Mel1220)                                                                                                                | Cisplatin                                                             | ADI-PEG20 (0.05 $\mu$ g/ml), cisplatin (0.1 $\mu$ g/ml), combination Xenografting (5x10 <sup>6</sup> A375 cells s.c. in Balb/c nude mice): ADI-PEG20 (53 IU/kg i.m. 6 days/week; (4 weeks total); cisplatin (6 mg/kg i.p.) once every 6 <sup>th</sup> day (3 doses total), combination | <ul style="list-style-type: none"> <li>- growth inhibitory/apoptosis assay (Annexin V)</li> <li>- protein abundance (WB: NOXA, MCL1, BCL2, XIAP, SURVIVIN, FANCD2, FANCL)</li> <li>- immunofluorescence (yH2AX)</li> <li>- survivin knock down</li> <li>- gene expression analyses (microarray)</li> <li>- autophagy (Cyto ID staining)</li> </ul>                                                                                                                              | <ul style="list-style-type: none"> <li>- boosted growth inhibitory effect of cisplatin with ADI-PEG20</li> <li>- increased tumor cell apoptosis</li> <li>- xenograft: similar growth inhibitory effects</li> <li>- mechanism: <ul style="list-style-type: none"> <li>a.) enhanced DNA damage + decreased DNA repair</li> <li>b.) interference with apoptotic and anti-apoptotic proteins enhances antitumor effect</li> </ul> </li> </ul>                                                                                                                                                                                                                                                                                        |
| <i>in vitro, in vivo</i> [66] | Prostate cancer (LNCaP, RWPE-1 cells, PC3)                                                                                                                       | Paclitaxel, z-VAD-fmk, Chloroquine,                                   | Paclitaxel (100 nM), z-VAD-fmk (50 $\mu$ M), Chloroquine (25 $\mu$ M), 2 $\mu$ M                                                                                                                                                                                                       | <ul style="list-style-type: none"> <li>- <sup>18</sup>F-FDG PET imaging: 4 or 24 hours after ADI-PEG20</li> <li>- gene expression (RT-PCR and qRT-PCR: ASS1)</li> </ul>                                                                                                                                                                                                                                                                                                         | <ul style="list-style-type: none"> <li>- ADI-PEG20 sensitivity correlates with ASS1 expression</li> <li>- ADI-PEG20: <ul style="list-style-type: none"> <li>a.) caspase-independent apoptosis/autophagy <i>in vitro</i></li> </ul> </li> </ul>                                                                                                                                                                                                                                                                                                                                                                                                                                                                                   |

|                               |                                                                                                                                                              |                                                                        |                                                                                                                                                                                                                                                                                                                                                      |                                                                                                                                                                                                                                                                                                                                                                                                                                              |                                                                                                                                                                                                                                                                                                                                                                                                                                                                                                                  |
|-------------------------------|--------------------------------------------------------------------------------------------------------------------------------------------------------------|------------------------------------------------------------------------|------------------------------------------------------------------------------------------------------------------------------------------------------------------------------------------------------------------------------------------------------------------------------------------------------------------------------------------------------|----------------------------------------------------------------------------------------------------------------------------------------------------------------------------------------------------------------------------------------------------------------------------------------------------------------------------------------------------------------------------------------------------------------------------------------------|------------------------------------------------------------------------------------------------------------------------------------------------------------------------------------------------------------------------------------------------------------------------------------------------------------------------------------------------------------------------------------------------------------------------------------------------------------------------------------------------------------------|
|                               | transiently transfected, CWR22Rv1 cells stably transfected with eGFP-LC3 plasmid                                                                             | Rapamycin                                                              | rapamycin Xenografting ( $1 \times 10^6$ CWR22Rv1 cells s.c. in Balb/c <sup>nu/nu</sup> mice): ADI-PEG20 (225 µg/mL), docetaxel (10 mg/kg bw), combination                                                                                                                                                                                           | <ul style="list-style-type: none"> <li>- protein abundance (WB: ASS1, caspase-3, Beclin1, pospho-AMP kinase, phospho-mTor, phospho-S6 kinase, phospho-S6, LC3, ERK1/2, phospho-ERK1/2, ELISA (Active Caspase-3))</li> <li>- proliferation assay (MTT)</li> <li>- apoptosis/necrosis assay (sub-G1 DNA fragmentation)</li> <li>- fluorescence Microscopy (LC3)</li> <li>- IHC on primaries (ASS1: 88 tumors and 59 normal samples)</li> </ul> | <ul style="list-style-type: none"> <li>b.) decreased tumor metabolic activity</li> <li>c.) ADI-PEG20 synergizes with taxane</li> <li>d.) autophagy delays and protects against ADI-PEG20-induced cell death</li> </ul> <p>- <i>in vivo</i>:</p> <ul style="list-style-type: none"> <li>a) <sup>18</sup>F-FDG uptake decreased after 24 hours</li> <li>b) tumor SUV decreased by 30 % after treatment: metabolic activity</li> <li>c) reduced tumor growth</li> <li>d) combination: synergistic effect</li> </ul> |
| <i>in vitro, in vivo</i> [77] | Sarcoma (SK-LMS-1, MNNG/HOS, MG-63, SK-UT-1, SK-UT-1B, Fuji, RD-ES, LUPI, NOS-1, HuO 9N2, HCH-1, SK-ES cells) U-2 OS cells, ASPS-1 cells, 293 T, SYO-1 cells | Chloroquine 5-aza-dC<br>Necrostatin<br>ZVAD-FMK<br>Pepstatin A<br>E64D | Chloroquine (10, 20 µM), 5-aza-dC (5 µM), necrostatin (10 µM), ZVAD-FMK (100 µM), Pepstatin A (50 µM), E64D (25 µM) ADI-PEG20 (1 µg/ml) Xenografting ( $1 \times 10^6$ ASS1 <sup>low</sup> MNNG/HOS cell or SK-LMS-1 cells, s.c. in nu/nu mice): ADI-PEG20 (320 IU/m <sup>2</sup> , biweekly, i.m.); Chloroquine (60 mg/kg daily, s.c.), combination | <ul style="list-style-type: none"> <li>- apoptosis/necrosis assay (FC: Annexin V/PI)</li> <li>- protein abundance (WB), co-immunoprecipitation (ASS1, LC3, p62, RIP1, caspase 8, BCL-2, cIAP1, cleaved PARP, caspase 3, RIP3, Atg5, Atg7)</li> <li>- IHC of the primary (ASS1)</li> </ul>                                                                                                                                                    | <ul style="list-style-type: none"> <li>- prevalence and prognostic value of ASS1<sup>low</sup> in sarcoma tumors and cell lines</li> <li>- ADI-PEG20: growth arrest</li> <li>- combination: ADI-PEG20 and chloroquine cause synthetic lethality via necroptosis</li> </ul>                                                                                                                                                                                                                                       |
| <i>in vitro, in vivo</i> [65] | Bladder cancer (RT112, 5637, SCaBER, 253J, T24, UMUC3)                                                                                                       | Pemetrexed                                                             | ADI-PEG20 (750 ng/ml) Xenografting ( $1 \times 10^7$ UMUC-3 cells s.c. in CD1 <sup>nu/nu</sup> mice): ADI-PEG20 (5 IU on days 1 and 8); pemetrexed (100 mg/kg on days 2–4 and 9–11), or combination                                                                                                                                                  | <ul style="list-style-type: none"> <li>- <sup>18</sup>F (FLT)–PET imaging</li> <li>- IHC (ASS1)</li> <li>- MSP (ASS1 promotor)</li> <li>- ASS1 overexpression and knockdown</li> <li>- proliferation/Invasion assays</li> <li>- protein abundance (WB: ASS1, TS, DHFR, TK1, p53R2, PARP)</li> <li>- liquid chromatography–mass spectrometry</li> </ul>                                                                                       | <ul style="list-style-type: none"> <li>- loss of ASS1: poor survival in bladder cancer</li> <li>- methylated ASS1 linked to increased proliferation and invasion of bladder cancer cells: sensitivity to ADI-PEG20</li> <li>- ADI-PEG20 inhibits pyrimidine metabolism in ASS1-negative tumor cells</li> <li>- combination: enhanced effect</li> </ul>                                                                                                                                                           |
| <i>In vitro, in vivo</i> [79] | Pancreatic cancer cell lines (MIA-PaCa2, PANC-1 (ASS1 <sup>+</sup> ), L3.3 (ASS1 <sup>+</sup> ))                                                             | Gemcitabine (GEM)                                                      | ADI-PEG20 (1.0 µg/ml) Xenografting ( $1 \times 10^6$ cells s.c. in athymic mice): ADI (5 IU, weekly), GEM (125 mg/kg, two days per week), combination                                                                                                                                                                                                | <ul style="list-style-type: none"> <li>- intracellular amino acid levels</li> <li>- proliferation assay (MTT)</li> <li>- protein abundance (WB: RRM2, hENT-1, dCK, Caspase3)</li> <li>- cell cycle analysis (Flow cytometry)</li> <li>- transfections, reporter assays</li> <li>- apoptosis/necrosis assay (FC: Annexin V/PI)</li> <li>- IHC (DNA fragmentation (TUNEL), cleaved Caspase-3)</li> </ul>                                       | <ul style="list-style-type: none"> <li>- ADI-PEG20: depletes intracellular arginine stores</li> <li>- <i>In vitro</i>: combination <ul style="list-style-type: none"> <li>a.) caspase-3 cleavage</li> <li>b.) loss of Annexin V positivity</li> <li>c.) abrogated GEM-induced RRM2 up-regulation</li> </ul> </li> <li>- synergistically enhanced tumor growth inhibition <i>in vivo</i></li> </ul>                                                                                                               |

|                               |                                                                                                                                                                              |                                               |                                                                                                                                                                                                                                        |                                                                                                                                                                                                                                                                                                                                                                                                                                                                                                                                                                                                                                                                                                             |                                                                                                                                                                                                                                                                                                                                                                                                                                                                                                                                                                                                                                                                                                                                                                                                                                                                                                                                                   |
|-------------------------------|------------------------------------------------------------------------------------------------------------------------------------------------------------------------------|-----------------------------------------------|----------------------------------------------------------------------------------------------------------------------------------------------------------------------------------------------------------------------------------------|-------------------------------------------------------------------------------------------------------------------------------------------------------------------------------------------------------------------------------------------------------------------------------------------------------------------------------------------------------------------------------------------------------------------------------------------------------------------------------------------------------------------------------------------------------------------------------------------------------------------------------------------------------------------------------------------------------------|---------------------------------------------------------------------------------------------------------------------------------------------------------------------------------------------------------------------------------------------------------------------------------------------------------------------------------------------------------------------------------------------------------------------------------------------------------------------------------------------------------------------------------------------------------------------------------------------------------------------------------------------------------------------------------------------------------------------------------------------------------------------------------------------------------------------------------------------------------------------------------------------------------------------------------------------------|
| <i>in vitro, in vivo</i> [71] | Pancreatic cancer (MIA-PaCa-2, PANC-1, BxPC-3, SW1990), breast cancer (MDA-MB-453, BT474, MDA-MB-231, MCF-7) HCC (HepG2, MHCC97-H)                                           | GEM                                           | Recombinant <i>M. arginini</i> ADI (46 kDa)<br>ADI (0–10 mU/mL)<br>GEM (0 or 100 nM)<br>Xenografting (1 × 10 <sup>7</sup> PANC-1 cells in BALB/ <i>c<sup>nu/nu</sup></i> mice, s.c.):<br>ADI (2 U/mouse), GEM (100 mg/kg), combination | <ul style="list-style-type: none"> <li>- IHC/Immunofluorescence (ASS1)</li> <li>- gene expression (RT-PCR and qRT-PCR: ASS1, Caspase-3, Caspase-9, Survivin, Bax, Bcl-2)</li> <li>- protein abundance (WB: STAT3 [Tyr705], total-STAT3, p-ERK1/2 [Thr202/Tyr204], and ERK1/2, p-Akt [Thr308], total-Akt, total NF-κB p65, caspase-3, caspase-9, XIAP, c-Jun, p21, p53, survivin, p-c-Jun [S73], p-NF-κB p65 [S536], lamin B1, cyclin D1, ASS1)</li> <li>- proliferation assay (MTT)</li> <li>- colony formation assay (CV)</li> <li>- apoptosis/necrosis assay (FC: Annexin V/PI)</li> <li>- cell cycle assay (Coulter Epics XL flow cytometer)</li> <li>- NF-κB p65 nuclear translocation assay</li> </ul> | <ul style="list-style-type: none"> <li>- ASS1 associated with unfavorable outcome</li> <li>- ADI-PEG20: <ul style="list-style-type: none"> <li>a.) cycle arrest (G1-phase), programmed cell death, attenuated colony formation ability</li> <li>b.) inactivates PI3K/Akt survival signal pathway</li> <li>c.) regulatory role on the expression of apoptosis-and cell cycle related genes, as well as phosphorylation of STAT3, AKT, and NF-κB</li> <li>d.) boosts GEM-induced cytotoxicity in pancreatic cancer cells/xenografts</li> </ul> </li> <li>- combination: enhanced inhibition of survivin expression</li> </ul>                                                                                                                                                                                                                                                                                                                       |
| <i>in vitro, in vivo</i> [96] | Embryonic kidney (HEK 293T/FT, breast cancer (MDA-MB-231, ATG5-, BECLIN 1-, SIRT3-knockdown MDA-MB-231, ASS1, SIRT3, GFP-LC3, MCF-7, ASS1-knockdown MCF-7, ZR-75-1, MCF-10A) | Bafilomycin A<br>Mdivi1<br>Oligomycin<br>FCCP | ADI-PEG20 (0-0.4 μg/ml)<br>Xenografting (5 × 10 <sup>6</sup> MDA-MB-231 and ATG5-knockdown MDA-MB-231 cells s.c. in NSG mice):<br>ADI-PEG20 (4 IU/kg bw) weekly for 3 weeks                                                            | <ul style="list-style-type: none"> <li>- IHC (ASS1)</li> <li>- gene expression (qRT-PCR, microarray)</li> <li>- cytotoxicity, apoptosis/necrosis assays (DIMSCAN assay, Annexin V/PI)</li> <li>- soft agar colony assays (MTT)</li> <li>- protein abundance (WB: MAP1LC3-I/II, SIRT3, Tom20, cyclophilin D, COX IV, ASS1, lenviral sh ASS1)</li> <li>- ATP assay (ENLITEN ATP Assay System)</li> <li>- oxygen consumption rate (Cellular mitochondrial function)</li> <li>- confocal microscopy/TEM/Oil Red staining</li> </ul>                                                                                                                                                                             | <ul style="list-style-type: none"> <li>- ADI-PEG20: <ul style="list-style-type: none"> <li>a.) selectively inhibits proliferation of ASS1 breast cancer cells</li> <li>b.) induces autophagy-dependent cell death</li> <li>c.) impairs mitochondrial bioenergetics</li> <li>d.) increases ROS and decreases mitochondrial membrane potential</li> <li>e.) induces mitochondrial fragmentation</li> </ul> </li> <li>- autophagy required to cause shrinkage of ADI-PEG20 treated tumors <i>in vivo</i></li> <li>- ASS1 abundance = prognostic factor for breast cancer survival</li> </ul>                                                                                                                                                                                                                                                                                                                                                         |
| <i>in vitro, in vivo</i>      | Myxofibrosarcoma (OH931, NMFH-1, NMFH-2) Dermal fibroblasts (CCD966SK) Human umbilical venous endothelial cells (HUVEC), Liposarcoma (LPS510: ASS1*)                         | 3-Dznep, UNC0638, Trichostatin A, 5-Aza-dC    | Xenografting (OH931 myxofibrosarcoma cells transfected with plasmids expressing GFP-FFLuc in SCID mice): ADI-PEG20 (2.5 IU/kg bw), 1 μmol/L 5-Aza                                                                                      | <ul style="list-style-type: none"> <li>- stable transfection (lipofection: pASS1-DDK-Myc expression)</li> <li>- gene expression (RT-PCR: ASS1, EZH2, and angiogenesis-associated genes)</li> <li>- tumor characteristics (ASS1 MSP and ASS1 immunostaining)</li> <li>- IHC (ASS1)</li> <li>- protein abundance (WB, ELISA)</li> <li>- functional assays (ASS1 re-expression, ASS1 knockdown, cell viability (BrdU assay), electric cell-substrate impedance sensing (ECIS), cell-cycle kinetic, soft-agar, HUVEC tube formation, wound healing and invasion assays)</li> <li>- <i>in vivo</i> imaging (IVIS camera system): monitoring of ADI-PEG20 treatment in xenografts</li> </ul>                      | <ul style="list-style-type: none"> <li>- ASS1 differentially downregulated (methylation)</li> <li>- ASS1 IHC correlates with methylation status, clinicopathologic features, and patient survival (loss of ASS1 = worst outcome for disease-specific and metastasis-free survival)</li> <li>- ADI-PEG20 attenuates cell viability in ASS1-deficient cells</li> <li>- <i>In vivo</i>: <ul style="list-style-type: none"> <li>a.) tumor shrinkage</li> <li>b.) fewer mitoses, increased collagenous matrix</li> <li>c.) less BrdU uptake in all ASS1-re-expressing cells</li> </ul> </li> <li>- ASS1 = tumor suppressor of myxofibrosarcomas</li> <li>- ASS1 re-expression inhibits: <ul style="list-style-type: none"> <li>a.) angiogenesis and tumor growth by suppressing cell proliferation (G1 arrest)</li> <li>b.) cell migration and invasion</li> </ul> </li> <li>- Stable ASS1 knockdown conferred proliferation and metastasis</li> </ul> |
| <i>in vitro, in vivo</i> [7]  | AML from patients                                                                                                                                                            | Cytarabine                                    | Xenografting (in NSG mice): ADI-PEG20 (5 IU/mouse) once a week for 4 weeks,                                                                                                                                                            | <ul style="list-style-type: none"> <li>- IHC (ASS1)</li> <li>- quantification of arginine and other amino acids (Ultra-high-performance liquid</li> </ul>                                                                                                                                                                                                                                                                                                                                                                                                                                                                                                                                                   | <ul style="list-style-type: none"> <li>- &gt;90 % of cases: ASS1</li> <li>- ADI-PEG20: <ul style="list-style-type: none"> <li>a.) induces apoptosis in half of primary AML cells <i>in vitro</i></li> </ul> </li> </ul>                                                                                                                                                                                                                                                                                                                                                                                                                                                                                                                                                                                                                                                                                                                           |

|                               |                                                                                                                                                                                                  |                       |                                                                                                                                                                                                                                                           |                                                                                                                                                                                                                                                                                                                                                                                                                      |                                                                                                                                                                                                                                                                                                                                                                                                                                                                                                           |
|-------------------------------|--------------------------------------------------------------------------------------------------------------------------------------------------------------------------------------------------|-----------------------|-----------------------------------------------------------------------------------------------------------------------------------------------------------------------------------------------------------------------------------------------------------|----------------------------------------------------------------------------------------------------------------------------------------------------------------------------------------------------------------------------------------------------------------------------------------------------------------------------------------------------------------------------------------------------------------------|-----------------------------------------------------------------------------------------------------------------------------------------------------------------------------------------------------------------------------------------------------------------------------------------------------------------------------------------------------------------------------------------------------------------------------------------------------------------------------------------------------------|
|                               |                                                                                                                                                                                                  |                       | Cytarabine, 10 days at doses of 0.2 mg daily                                                                                                                                                                                                              | chromatography mass spectrometry/mass spectrometry)<br>- MSP (ASS1)                                                                                                                                                                                                                                                                                                                                                  | b.) depletes plasma arginine <i>in vivo</i><br>c.) reduces AML burden<br>- resistant AML cells: increased ASS1 expression<br>- normal human bone marrow HSCs: enriched for ASS1<br>- ADI-PEG20–sensitive AML increased uptake of extracellular arginine via CAT-1<br>- AML-derived arginase depletes plasma arginine (not as effective as ADI-PEG 20)                                                                                                                                                     |
| <i>in vitro, in vivo</i> [97] | Different (RT4, SCaBER, UM-UC-3, T24, J82, Jurkat, RT112, 5637)                                                                                                                                  | 5-Aza-dC, chloroquine | ADI-PEG20 (1.2 µg/ml), 5-Aza-dC (0.3 µmol/L), chloroquine (25 µmol/L)<br>Xenografting (1 × 10 <sup>6</sup> cells in BALB/ <i>c<sup>nu/nu</sup></i> mice, s.c., right flank: RT112 cells (ASS1*), left flank: UM-UC-3 cells (ASS1): ADI-PEG20 (5 IU/mouse) | - IHC on primary tumor tissue (ASS1)<br>- protein abundance (WB: ASS1, p-eIF2α (Ser51), eIF2α, GCN2, ATF4, (CHOP), LC3A/B, PARP, pro- and cleaved-caspases<br>- transfection (Lipofection: ASS1 overexpression)<br>- colony Formation Assay (CV)<br>- proliferation assay (MTT)<br>- apoptosis (Flow Cytometric Analysis Annexin V)<br>- immunofluorescence (autophagy: LC3A/B)<br>- IHC (DNA fragmentation (TUNEL)) | - ASS1 loss: evident in subtypes of bladder cancer, SCC, squamous cell carcinoma<br>- ADI-PEG 20<br>a.) reduces colony formation and cell viability in ASS1-bladder cancer cells<br>b.) induces Caspase-Independent apoptosis and autophagy<br>c.) induces GCN2-dependent eIF2α phosphorylation (Ser51) and ATF4-CHOP induction<br>d.) reduces <i>in vivo</i> tumor growth<br>- modulation of ASS1 expression: reverses response to ADI-PEG 20 in ASS1 <sup>+/+</sup> cancer cells                        |
| <i>in vitro, in vivo</i> [91] | Different (A2780, AGS, A375, A549, HT-1080, MSTO-211H H1299, Mia Paca-2, SKOV-3, HT29, HCT116, SNU-398, SNU-16, Panc-1, K562, SNU-1 = ASS low), N87 = ASS1 high PBMCs from five different donors | IFN-γ anti-mPD-1      | Xenografting (5 × 10 <sup>5</sup> B16-F10 cells s.c. in C57BL/6 mice): ADI-PEG20 (12 mg/kg bw QWx2 i.m., anti-mPD-1 (10 mg/kg bw Q2D, i.p.)<br>IFN-γ: 200 ng/ml                                                                                           | - cell viability and caspase 3/7 induction assay<br>- phenotyping (FC: PD-L1 surface levels)<br>- gene expression (RT-qPCR)<br>- protein abundance<br>- IHC (PD-1 and PD-L1)                                                                                                                                                                                                                                         | - ADI-PEG20: cell line specific differences (concentration-dependent increase of PD-L1 in ASS1 <sup>low</sup> cell lines)<br>a.) affected by MEK/ERK and PI3K/AKT pathways<br>b.) no effect on resting PBMCs but during initial stimulation: inhibited T cell activation<br>c.) inhibit regulatory T cells<br>d.) induces T cell infiltration in <i>in vivo</i> model<br>e.) inhibits tumor growth in syngeneic models (combination with PD-1/PD-L1-neutralizing antibodies), combination boosted effects |

CV – crystal violet; FC – Flow cytometry; GBM – Glioblastoma multiforme; GEM – Gemcitabine; IHC – immunohistochemistry; MSP – methylation-specific PCR; WB – Western Blot

**Table S2: Overview on completed clinical studies using ADI-PEG20 alone or in combination with other substances.**

| Phase/<br>Study<br>design/<br>Reference | Tumor entity/entities                                                                                                                                                                                           | Additional<br>intervention    | Treatment schedule                                                                                                                                                                                                                                                                                                                                                                                                                                               | Treatment-related toxicities                                                                                                                                                                                                                                                                                                                                       | Outcome                                                                                                                                                                                                                                                                                                                                                                                                                                                                                                                                                                                    |
|-----------------------------------------|-----------------------------------------------------------------------------------------------------------------------------------------------------------------------------------------------------------------|-------------------------------|------------------------------------------------------------------------------------------------------------------------------------------------------------------------------------------------------------------------------------------------------------------------------------------------------------------------------------------------------------------------------------------------------------------------------------------------------------------|--------------------------------------------------------------------------------------------------------------------------------------------------------------------------------------------------------------------------------------------------------------------------------------------------------------------------------------------------------------------|--------------------------------------------------------------------------------------------------------------------------------------------------------------------------------------------------------------------------------------------------------------------------------------------------------------------------------------------------------------------------------------------------------------------------------------------------------------------------------------------------------------------------------------------------------------------------------------------|
| I<br>[98]                               | 9 patients with <i>ASS1</i> -cancers: 5 untreated patients with advanced malignant pleural mesothelioma (MPM)<br><br>4 untreated patients with stage IIIB or IV non-squamous non-small-cell lung cancer (NSCLC) | Cisplatin<br>Pemetrexed       | weekly:<br>ADI-PEG20 i.m.: three patients each 18 mg/m <sup>2</sup> , 27 mg/m <sup>2</sup> , 36 g/m <sup>2</sup> *, 48 hours before first drug dose<br>every 3 weeks:<br>cisplatin 75 mg/m <sup>2</sup> and pemetrexed 500 mg/m <sup>2</sup> , both i.v.; daily folic acid 400 mg, i.m., hydroxycobalamin 1,000 mg, i.m., every 9 weeks, both started at least 7 days before the first dose.<br>ADIPemCis therapy continued for maximum of six cycles (18 weeks) | no dose-limiting toxicities (DLT) adverse events (AE): grade 1 (83 % of total) or 2. most common toxicities: fatigue, nausea, vomiting, oropharyngeal toxicity (stomatitis, mucositis, and oral candidiasis), rash<br>no DLTs or treatment-related deaths<br>mostly attributable to pemetrexed and/or cisplatin therapy<br>ADI-PEG 20: 9/38 patients: grade 1 or 2 | rapid decline of circulating arginine levels, but rapid increase of citrulline levels; both changes persisted at 18 weeks<br><br>ADIPemCis triplet prolonged overall survival vs. ADI-PEG 20 monotherapy in previous study (ADAM)<br><br>Stable disease (SD) or better: all patients<br>Partial response (PR): 7/9 patients (78 %) at all dose levels investigated, including three with either sarcomatoid or biphasic MPM                                                                                                                                                                |
| 1/1B non-randomized, open-label<br>[25] | 9 patients without treated and 9 patients with untreated metastatic pancreatic cancer                                                                                                                           | Gemcitabine<br>Nab-paclitaxel | weekly i.m. ADI-PEG20 injection of 18 (cohort 1: three patients) or 36 mg/m <sup>2</sup> (cohort 2: six patients) in combination with gemcitabine (1000 mg/m <sup>2</sup> ) and Nabpaclitaxel (125 mg/m <sup>2</sup> ) (both weekly for 3 of 4 weeks)<br>Recommended phase 2 dose (RP2D): 11 patients (9 patients treated during the expansion phase and 2 patients treated in cohort 2 not receiving prior therapy)                                             | Cohort 1: no DLT<br>Cohort 2: 1 patient had a DLT (grade 3 elevation in bilirubin, aspartate aminotransferase, and alanine aminotransferase)<br>All patients experienced grade 3/4 AEs (regardless of any drugs: 67 % neutropenia, 56 % leukopenia, 44 % anemia, and 33 % lymphopenia)                                                                             | response rate in first-line setting: 45 % (5 months); median overall survival (OS): 11.3 months<br>PR: 39 % (7 of 18); SD: 56 % (10 of 18), Disease Control Rate (DCR): 94 % (17 of 18)<br>RP2D group: 45 % PR (5/11)<br>SD: 45 % (5/11 for 8 or more weeks)<br>DCR: 91 % (10/11)<br>median duration of response: 3.7 months (1.9-11.0 months)<br>progression-free survival (PFS): 6.1 months; OS: 11.3 months<br>duration of arginine depletion to ≤10 μM in patients with PR and SD: 16 and 13 weeks<br>median arginine levels suppressed and median citrulline levels elevated (4 week) |
| II<br>Interventional<br>I<br>[99]       | 21 patients with acute myeloid leukemia (AML), relapsed or refractory leukemia after receiving at least one prior therapy                                                                                       | None                          | weekly i.m. ADI-PEG20 36 mg/m <sup>2</sup> (4 weeks as one cycle)<br>allopurinol to prevent hyperuricemia<br>Treatment continued until progressive disease (PD), development of unacceptable toxicity, death, or withdrawal of consent for any reason                                                                                                                                                                                                            | 9 % grade 1/2 skin rash<br>7 % grade 1/2 hyperuricemia<br>7 % grade 3/4 leukopenia<br>5 % grade 3/4 neutropenic fever<br>5 % anemia<br>One patient: grade 4 tumor lysis syndrome, infection, dead<br>grade 4 anaphylactic shock in one patient                                                                                                                     | Complete remission (CR): 10 % (2/21), response durations of 7.5 and 8.8 months<br>SD: 33 % (7/ 21) (3.5 months: median time to PD); PFS: 1.8 months; OS: 7.9 months<br>DCR: 43 % correlated with median of 8 weeks (range 5–25) of arginine depletion to ≤10 μM or nearly undetectable in patients with CR or SD<br>arginine level: markedly decreased, accompanied by increases in circulating citrulline levels after first dose<br>some markers for AML subtypes and c-MYC                                                                                                              |



|                           |                                                                                                                                                                                                                                                                                                                                                                                                              |           |                                                                                                                                                                                                                                                                                                                                                                                                                                                                                                                                                                                          |                                                                                                                                                                                                                                                                                                                                                                                                                                                                                                                     |                                                                                                                                                                                                                                                                                                                                                                                                                                                                                                                                                                                                                                                             |
|---------------------------|--------------------------------------------------------------------------------------------------------------------------------------------------------------------------------------------------------------------------------------------------------------------------------------------------------------------------------------------------------------------------------------------------------------|-----------|------------------------------------------------------------------------------------------------------------------------------------------------------------------------------------------------------------------------------------------------------------------------------------------------------------------------------------------------------------------------------------------------------------------------------------------------------------------------------------------------------------------------------------------------------------------------------------------|---------------------------------------------------------------------------------------------------------------------------------------------------------------------------------------------------------------------------------------------------------------------------------------------------------------------------------------------------------------------------------------------------------------------------------------------------------------------------------------------------------------------|-------------------------------------------------------------------------------------------------------------------------------------------------------------------------------------------------------------------------------------------------------------------------------------------------------------------------------------------------------------------------------------------------------------------------------------------------------------------------------------------------------------------------------------------------------------------------------------------------------------------------------------------------------------|
|                           |                                                                                                                                                                                                                                                                                                                                                                                                              |           |                                                                                                                                                                                                                                                                                                                                                                                                                                                                                                                                                                                          |                                                                                                                                                                                                                                                                                                                                                                                                                                                                                                                     | regulated genes = ADI-PEG20 response predictors                                                                                                                                                                                                                                                                                                                                                                                                                                                                                                                                                                                                             |
| I/II [100]                | 18 patients (advanced solid malignancies with a life expectancy greater than 3 months and with any number of prior therapies, but completed 4 weeks or more before study entry) nine: NSCLC three: castrate-resistant prostate cancer (CRPC), two or more forms of hormone therapy two: Head and neck squamous cell carcinoma four: small cell lung cancer, gastric cancer, colorectal cancer, thymic cancer | Docetaxel | <u>phase I</u><br>ADI-PEG 20: weekly i.m. injections; six patients at 4.5 mg/m <sup>2</sup> ; three at 9 mg/m <sup>2</sup> ; three at 18mg/m <sup>2</sup> ; six at 36 mg/m <sup>2</sup> dose level (dose escalated according to a standard 3x3 phase)<br>Docetaxel: 75 mg/m <sup>2</sup> , administrated every 3 weeks and 1 hr after ADI-PEG20 injection daily taken Prednisone (10 mg) by CRPC patients<br><u>phase II</u><br>study in HCC that demonstrated consistently higher citrulline levels (320 IU/m <sup>2</sup> )<br>ADI-PEG20: up to one year<br>Docetaxel: up to 10 cycles | single DLT (grade 3 urticaria attributed to ADI-PEG 20), no additional DLT in remaining dose level<br>hematologic toxicities: 14 patients (grade 3 to 4 leukopenia or neutropenia)<br>non-hematologic toxicity fatigue (16 patients)<br>Skin reactions (grade 3 or higher) including five rash, three palmar-plantar erythrodysesthesia, and one urticarial rash<br>Laboratory abnormalities: usually grades 1 to 2 (hypoalbuminemia), liver function test elevations and hyperuricemia, attributable to ADI-PEG 20 | varying suppression of plasma arginine levels in 10 patients achieving at least a 50 % reduction of baseline values (longer suppression obtained at higher doses), reciprocal change in mean plasma citrulline levels<br>return to baseline plasma arginine correlated with increased antibody titer<br>CR: two patients (10 cycles of docetaxel, continued by ADI-PEG 20 alone)<br>PR: four patients<br>SD: 7 patients<br>One patient with small cell lung cancer (low-dose ADI-PEG 20) treated for 67 weeks<br>One patient with CRPC (high-dose ADI-PEG 20) still receiving treatment after completing docetaxel with 5 cycles of single-agent ADI-PEG 20 |
| II randomized [101]       | 68 adults with advanced ASS1 MPM                                                                                                                                                                                                                                                                                                                                                                             | None      | Randomization 2:1 to arginine deprivation (ADI-PEG20, 36.8 mg/m <sup>2</sup> , weekly i.m.) plus best supportive care (BSC) or BSC alone (median follow up: 38 (2.5-39) months)                                                                                                                                                                                                                                                                                                                                                                                                          | AE: grade 3: 25 % (11/44) patients (ADI-PEG20) vs. 4/24 (17 %) patients (BSC) (P = 0.43)<br>most commonly: immune related, fatigue, nonfebrile neutropenia, gastrointestinal events                                                                                                                                                                                                                                                                                                                                 | ASS1 gene-body methylation correlated with ASS1 IHC, longer Arg deprivation correlated with improved PFS.<br>SD: 52 % (12/23) ADI-PEG20 vs. 22 % (2/9) BSC (P =0.23) at 4 months (modified RECIST)<br>Median survival (MS): 15.7 ADI-PEG20 vs 12.1 months BSC (difference of 3.6 [95% CI, -1.0 to 8.1] months; P = 0.13)                                                                                                                                                                                                                                                                                                                                    |
| I/II open-label [102]     | 31 patients with previously treated unresectable stage III or IV melanoma                                                                                                                                                                                                                                                                                                                                    | None      | phase I: weekly i.m. injections for 8 weeks in each of three dose levels including 40 (6 patients), 80 (6 patients) or 160 (19 patients) IU/m <sup>2</sup> ADI-PEG 20<br><br>phase II (a Simon minimax two-stage design): 17 patients at MTD                                                                                                                                                                                                                                                                                                                                             | Cohort 1 and 3: None<br>Cohort 2: one case grade 3 arthralgia<br>AE: grade 1 and 2: injection site pain, rash, and fatigue; treatment-related grade 3: 8 cases<br>Maximum tolerated dose (MTD) reached eight patients (27.6 %, one in cohort 1 and 7 in cohort 3) had PMR after treatment initiation (not indicative of PR nor SD by RECIST criteria)<br>ASS1 IHC: negative in 24 patients, 5 patients had <5 % positive cells                                                                                      | complete plasma arginine depletion: 97 % (30/31) by day 8, dose-independently<br>Mean plasma ADI-PEG20 levels inversely correlated with ADI-PEG 20 antibody levels<br>SD: 31 % (9/31):<br>- 2 patients: durable SD for >6 months (in uveal melanoma)<br>- 4 patients: uveal melanoma<br><br>→ SD rate: 67 %<br>Improved median time progression for uveal melanoma patients (113 days vs. 57 days)<br>PD: 71 % at first assessment<br>phase II<br>SD: 24 % (4/17), but: no objective response                                                                                                                                                               |
| II open-label, randomized | Asian patients with (pretreated) metastatic or locally advanced HCC; 88.7 % (63 patients) failed                                                                                                                                                                                                                                                                                                             | None      | ADI-PEG 20: weekly i.m. injections at doses of 160 (37 patients) or 320 (34 patients) IU/m <sup>2</sup> for 4 weeks (as one cycle) and maximum six cycles                                                                                                                                                                                                                                                                                                                                                                                                                                | AE: grades 1–2 local and/or allergic reactions and drug-related metabolic changes (26.8 % hypersensitivity/skin rash, 22.5 % local tissue reaction at injection site, 19.7 %                                                                                                                                                                                                                                                                                                                                        | decreased circulating arginine level after 1 <sup>st</sup> dose and gradual rise during treatment followed by reciprocal change in circulating citrulline levels, return to baseline plasma                                                                                                                                                                                                                                                                                                                                                                                                                                                                 |

|                    |                                                                                                                                                                                                                             |      |                                                                                                                                                                                                                                                                                                                                                                                                                                                                                                                                      |                                                                                                                                                                                                                                                    |                                                                                                                                                                                                                                                                                                                                                                                                                                                                          |
|--------------------|-----------------------------------------------------------------------------------------------------------------------------------------------------------------------------------------------------------------------------|------|--------------------------------------------------------------------------------------------------------------------------------------------------------------------------------------------------------------------------------------------------------------------------------------------------------------------------------------------------------------------------------------------------------------------------------------------------------------------------------------------------------------------------------------|----------------------------------------------------------------------------------------------------------------------------------------------------------------------------------------------------------------------------------------------------|--------------------------------------------------------------------------------------------------------------------------------------------------------------------------------------------------------------------------------------------------------------------------------------------------------------------------------------------------------------------------------------------------------------------------------------------------------------------------|
| [103]              | previous therapies (40.8 % surgery, 64.8 % chemo-embolization, 43.6 % chemotherapy/ targeted therapy, 26.8 % radiation therapy)                                                                                             |      | 3 and 5 patients in the 320 and 160 IU/m <sup>2</sup> arms: six cycles before ADI-PEG 20 administration: assessment of serum $\alpha$ -fetoprotein, uric acid levels, circulating arginine and citrulline levels; after every cycle (4 weeks): blood count, biochemistry and coagulation test, urinary analyses, anti-ADI-PEG 20 antibody titer                                                                                                                                                                                      | hyperuricemia, 15.5 % pruritus, 9.8 % fatigue, 4.2 % hyperammonemia, 7.0 % fever, 5.6 % diarrhea)                                                                                                                                                  | arginine correlated with increased antibody titer<br>DCR and the OS: 31 % and 7 %<br>- no statistical difference for both PFS and OS between two cohorts<br>- patients with longer circulating arginine depletion ( $\geq 4$ weeks) trend towards better OS                                                                                                                                                                                                              |
| II randomized [75] | 76 patients with metastatic or inoperable HCC with expected survival of $\geq 12$ weeks<br>42.5 %: no prior treatment<br>others: combination of HACE, systemic chemotherapy, radiofrequency ablation, i.t. ethanol, surgery | none | ADI-PEG20 weekly randomly administered i.m. 80 IU/m <sup>2</sup> (37 patients) or 160 IU/m <sup>2</sup> (39 patients) up to 6 months                                                                                                                                                                                                                                                                                                                                                                                                 | AE: grade 1 or 2 (transient and reversible encephalopathy, skin irritation, or pain at the site of injection combined with low-grade fever)<br>grade 3 or worse: 19.5 %                                                                            | Mean survival: 15.8 months (474 days $\pm$ 39 days) from diagnosis, no significant differences between cohorts<br>SD (according to the RECIST criteria) and DCR: 60 % and 63 % of patients<br>CR/PR: 1 patient each<br>Arg levels remained below baseline for 50 days while antibodies similarly reached a plateau<br>Arg levels returned to baseline, the citrulline levels remained high<br>patients with PD: higher increase in AFP levels after two treatment cycles |
| I and II [8]       | Inoperable stage IV metastatic melanoma<br>None of the patients had chemotherapy or surgery either 30 days before or during this study                                                                                      | none | 15 patients in US phase I study: ADI-SS PEG: three i.m. injections at doses 20, 40, or 80 U/m <sup>2</sup> on days 1, 15, and 22 with three patients in each cohort; Six patients enrolled at 160 U/m <sup>2</sup> (OBD); 14 patients completed 24 patients in Italian phase I to II study: three i.m. injections of 40, 80, 160 or 320 U/m <sup>2</sup> on days 1, 15, and 22 (three patients in each cohort)<br>Six patients: one cycle with 640 U/m <sup>2</sup><br>Six patients: three cycles (four once-weekly i.m. injections) | no grade 3 or 4 toxicities<br>clinical laboratory abnormalities: hyperuricemia                                                                                                                                                                     | - 160 U/m <sup>2</sup> : decreased plasma Arg level (less than 2 $\mu$ mol/L for at least 7 days)<br>- US phase I study: no clinical response<br>- Italian phase I to II study:<br>- CR: one patient<br>- PR: 21 % (5/24) with prolonged survival                                                                                                                                                                                                                        |
| I and II [104]     | 19 advanced or metastatic inoperable HCC patients<br>None of these patients had any chemotherapy within 30 days before or during this study                                                                                 | none | three i.m. injections of ADI-SS PEG at dosages 20, 40, or 80 U/m <sup>2</sup> on days 1, 15, and 22 with three patients each<br>Six patients: 160 U/m <sup>2</sup><br><br>Subsequent cycles: four treatments on days 1, 8, 15, and 22. Subsequent cycles initiated on day 36 of the preceding cycle<br>15 patients (79 %) completed all cycles                                                                                                                                                                                       | no evidence of systemic or local cutaneous allergic response, no SAE after treatment<br>clinical laboratory abnormalities: hyperuricemia (adverse event)<br>mean KPS: 66 % at start of therapy to 91 % at end the median Child-Pugh classification | 160 U/m <sup>2</sup> : decreased sufficient to lower plasma Arg from a resting level of approximately 130 $\mu$ mol/L to below the level of detection (< 2 $\mu$ mol/L) for more than 7 days<br>Radiologic assessment indicated:<br>CR: 11 % (2/19) confirmed by CT scans<br>PR: 37 % (7/19)<br>SD: 37 % (7/19)<br>PD: 16 % (3/19)<br>Mean durability of the response: >400 days (range, 37 to >680 days)                                                                |

AE - adverse events; BSC - best supportive care; CR - complete remission; DCR - Disease Control Rate; DLT - dose-limiting toxicity; HACE - Hepatic arterial chemoembolization; HCC - hepatocellular carcinoma; IHC - immunohistochemistry; i.t. - intratumoral; MPM - malignant pleural

mesothelioma; MS - Median survival; MTD - maximum tolerated dose; NSCLC - non-squamous non-small-cell lung cancer OS - overall survival; PD - progressive disease; PFS - progression-free survival; PR - Partial response; RP2D - Recommended phase 2 dose; SD - Stable disease

**Table S3: Overview on running or recently completed clinical studies using ADI-PEG20 alone or in combination with other substances.**

| Phase/Study design                                                       | Tumor entity/entities                                                                                | Intervention                       | Treatment schedule                                                                                                                                                                                                                                                                                                                                                                                                                                                    | Status                  | Clinical trial.gov identifier |
|--------------------------------------------------------------------------|------------------------------------------------------------------------------------------------------|------------------------------------|-----------------------------------------------------------------------------------------------------------------------------------------------------------------------------------------------------------------------------------------------------------------------------------------------------------------------------------------------------------------------------------------------------------------------------------------------------------------------|-------------------------|-------------------------------|
| I<br>Interventional                                                      | advanced gastrointestinal malignancies, HCC, gastric cancer, CRC                                     | FOLFOX                             | not provided                                                                                                                                                                                                                                                                                                                                                                                                                                                          | recruiting participants | NCT02102022                   |
| I<br>interventional                                                      | AML                                                                                                  | Cytarabine                         | ADI-PEG 20 (18 and 36 mg/m <sup>2</sup> ) weekly in combination with low-dose Cytarabine (20 mg BID [twice daily] for 10 days, every 28 days)                                                                                                                                                                                                                                                                                                                         | recruiting participants | NCT02875093                   |
| I<br>dose-escalation and interventional                                  | NSCLC, advanced peritoneal mesothelioma, metastatic uveal melanoma, HCC, glioma, sarcomatoid cancers | Pemetrexed<br>Cisplatin            | Weekly ADI-PEG 20 at doses 18, 27 and 36 mg/m <sup>2</sup> , pemetrexed 500 mg/m <sup>2</sup> , Cisplatin 75 mg/m <sup>2</sup> both given every 3 weeks<br>maximum of 6, 3-week cycles of ADIPemCis for a total of 18 weeks; NSCLC patients: 4 to 6, 3-week; patients completing ADIPemCis treatment may continue ADI-PEG 20 monotherapy if SD or better NSCLC patients may continue Pemetrexed + ADI-PEG20 and/or continue on ADI-PEG20 monotherapy after Pemetrexed | recruiting participants | NCT02029690                   |
| I                                                                        | cutaneous melanoma, uveal melanoma, ovarian carcinoma                                                | Cisplatin                          | not provided                                                                                                                                                                                                                                                                                                                                                                                                                                                          | completed               | NCT01665183                   |
| I<br>Interventional                                                      | HER2 negative metastatic breast cancer                                                               | Doxorubicin                        | single group assignment<br>not provided                                                                                                                                                                                                                                                                                                                                                                                                                               | completed               | NCT01948843                   |
| I<br>interventional non-randomized                                       | metastatic melanoma                                                                                  |                                    | ADI-SS PEG i.m. 3 times over 4-weeks<br>4 cohorts of patients each receiving a different dose level                                                                                                                                                                                                                                                                                                                                                                   | completed               | NCT00029900                   |
| I<br>interventional                                                      | advanced HCC                                                                                         | Sorafenib                          | not provided                                                                                                                                                                                                                                                                                                                                                                                                                                                          | completed               | NCT02101593                   |
| I/II, open-label, dose-escalation non-randomized (sequential assignment) | advanced melanoma                                                                                    |                                    | ADI-PEG 20, at escalating doses weekly i.m. for 9 weeks (cycle 1) or 8 weeks (subsequent cycles):<br>- Cohort 1 (40 IU/m <sup>2</sup> )<br>- Cohort 2 (80 IU/m <sup>2</sup> )<br>- Cohort 3 (160 IU/m <sup>2</sup> )                                                                                                                                                                                                                                                  | completed               | NCT00520299                   |
| 1B<br>Dose escalation                                                    | advanced solid cancers                                                                               | Pembrolizumab                      | ADI-PEG 20 (36 mg/m <sup>2</sup> ) weekly in combination with pembrolizumab (1 and 2 mg/kg or 200 mg) every three weeks                                                                                                                                                                                                                                                                                                                                               | recruiting participants | NCT03254732                   |
| 1B                                                                       | advanced pancreatic carcinoma                                                                        | Nab-paclitaxel<br>Gemcitabine      | not provided                                                                                                                                                                                                                                                                                                                                                                                                                                                          | ongoing                 | NCT02101580                   |
| II/III<br>randomized parallel assignment                                 | malignant pleural mesothelioma                                                                       | Pemetrexed<br>Cisplatin<br>Placebo | ADIPemCis<br>ADI-PEG20: 36 mg/m <sup>2</sup> , i.m. weekly<br>Pemetrexed: 500 mg/m <sup>2</sup> every 3 weeks<br>Cisplatin: 75 mg/m <sup>2</sup> , i.v. every 3 weeks                                                                                                                                                                                                                                                                                                 | recruiting participants | NCT02709512                   |
| II<br>interventional non-randomized                                      | unresectable HCC                                                                                     |                                    | ADI-PEG20: 160 IU/m <sup>2</sup> , weekly                                                                                                                                                                                                                                                                                                                                                                                                                             | completed               | NCT00056992                   |

|                                                     |                                                    |                                                             |                                                                                                                                                     |           |             |
|-----------------------------------------------------|----------------------------------------------------|-------------------------------------------------------------|-----------------------------------------------------------------------------------------------------------------------------------------------------|-----------|-------------|
| II<br>interventional<br>randomized                  | unresectable HCC                                   | Concurrent<br>Transarterial<br>Chemoemboliza<br>tion (TACE) | not provided<br>ADI PEG 20 + TACE vs TACE alone                                                                                                     | completed | NCT02006030 |
| III<br>interventional<br>randomized<br>double-blind | advanced HCC with failed<br>prior systemic therapy | Placebo                                                     | ADI-PEG20: 18 mg/m <sup>2</sup> , i.m., weekly until disease progression or toxicity<br>Placebo: i.m., weekly until disease progression or toxicity | completed | NCT01287585 |

AML – acute myeloid leukemia; CRC – colorectal cancer; HCC – hepatocellular carcinoma; i.m. – intramuscularly; i.v. – intravenously; NSCLC – non-small cell lung cancer; TACE – Transarterial Chemoembolization
